# Supplementary material
Source: MDPI journal article supplement (https://www.mdpi.com/2076-3417/9/12/2438)
Supplement: s1 [file s1]

# Supplementary Materials: Novel Polymer–Silica Composite-Based Bifunctional Catalysts for Hydrodeoxygenation of 4-(2-Furyl)-3-Buten-2-One as Model Substance for Furfural–Acetone Aldol Condensation Products

Michael Goepel, Ruben Ramos, Roger Gläser and David Kubička

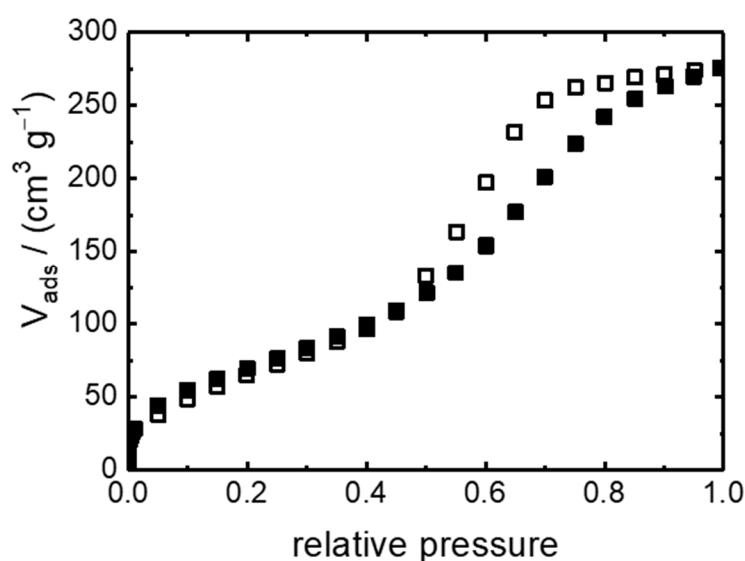

**Figure S1.** Volume adsorbed ( $V_{\text{ads}}$ ) over relative pressure ( $p / p_0$ ) from  $\text{N}_2$  sorption for (1)Pt(13)PSC recorded at  $-196\text{ }^\circ\text{C}$ .

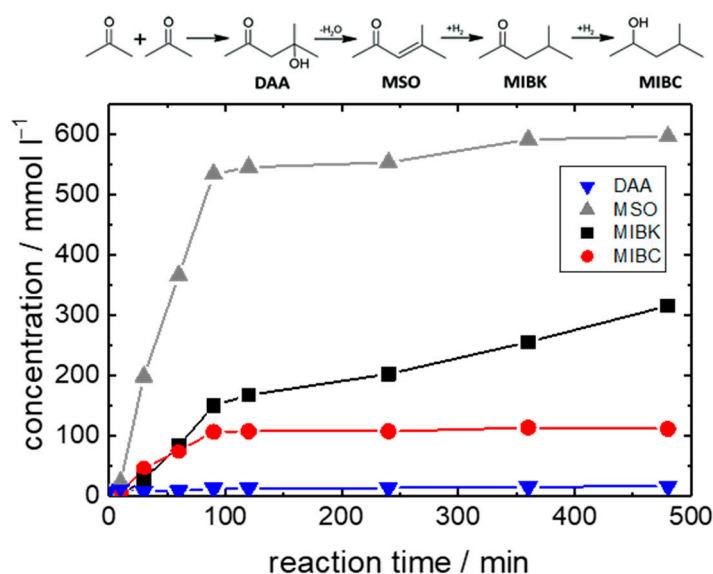

**Figure S2.** Reactant concentration of the self-condensation products of acetone over time for the HDO of FAc carried out using (1)Pt(13)PSC as a catalyst and acetone as a solvent ( $T = 250\text{ }^\circ\text{C}$ ,  $p_{\text{H}_2} = 100\text{ bar}$ ,  $m_{\text{catalyst}} = 0.25\text{ g}$ ,  $0.5\text{ g FAc}$  ( $24.5\text{ mmol l}^{-1}$ ) dissolved in  $150\text{ ml}$  acetone, stirring speed =  $1000\text{ min}^{-1}$ ).

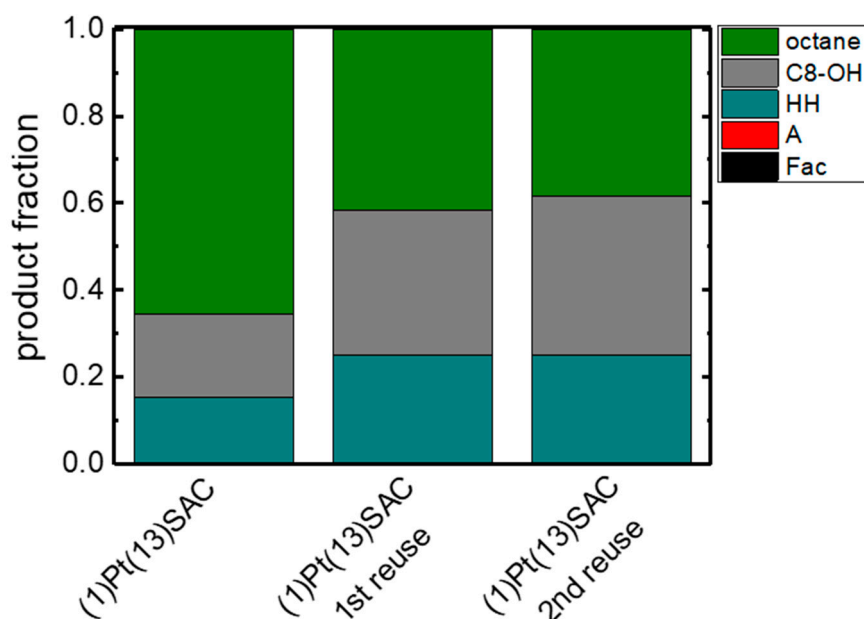

**Figure S3.** Product fractions obtained for the reusability studies of (1)Pt(13)PSC in the HDO of FAc ( $T = 250\text{ }^{\circ}\text{C}$ ,  $p_{\text{H}_2} = 100\text{ bar}$ ,  $m_{\text{catalyst}} : m_{\text{FAc}} = 2 : 1$ ,  $c_{\text{FAc}} = 24.5\text{ mmol l}^{-1}$ , solvent: cyclohexane, stirring speed =  $1000\text{ min}^{-1}$ ). The catalyst was washed five times with 50 ml cyclohexane and subsequently dried for 5 h at  $200\text{ }^{\circ}\text{C}$  in an air atmosphere between the experiments.

**Table S1.** Productivity (given as mmol octane produced per gram of noble metal and hour) and reaction conditions for the hydrodeoxygenation of 4-(2-furyl)-3-buten-2-one reported in literature and this work ((1)Ru(13)PSC)).

| Catalyst                                                | Productivity /<br>(mmol g <sup>-1</sup> h <sup>-1</sup> ) | T / °C | p <sub>H<sub>2</sub></sub> / bar | Solvent                |
|---------------------------------------------------------|-----------------------------------------------------------|--------|----------------------------------|------------------------|
| Ru/SILP [1] <sup>a</sup>                                | 0.5                                                       | 150    | 120                              | (EMIM)NTf <sub>2</sub> |
| Pt/Al-SBA15 [2]                                         | 0.0                                                       | 200    | 50                               | Cyclohexane            |
| Pd/Al-MCM-41 [3]                                        | 90.9                                                      | 80     | 40 <sup>b</sup>                  | scCO <sub>2</sub>      |
| Pd/Nb <sub>2</sub> O <sub>5</sub> [4]                   | 12.1                                                      | 170    | 20                               | Cyclohexane            |
| Pd/Nb <sub>2</sub> O <sub>5</sub> /SiO <sub>2</sub> [5] | 10.9                                                      | 170    | 25                               | Cyclohexane            |
| (1)Ru(13)PSC                                            | 165.3                                                     | 250    | 200                              | Cyclohexane            |

<sup>a</sup> using 4-(2-furyl)-butan-2-one (substance A, Figure 1) as reactant, <sup>b</sup> pCO<sub>2</sub> = 140 bar.

## References

1. Luska, K.L.; Julis, J.; Stavitski, E.; Zakharov, D.N.; Adams, A.; Leitner, W. Bifunctional nanoparticle–SILP catalysts (NPs@ SILP) for the selective deoxygenation of biomass substrates. *Chem. Sci.* **2014**, *5*, 4895–4905.
2. Ramos, R.; Tišler, Z.; Kikhtyanin, O.; Kubička, D. Towards understanding the hydrodeoxygenation pathways of furfural–acetone aldol condensation products over supported Pt catalysts. *Catal. Sci. Technol.* **2016**, *6*, 1829–1841.
3. Chatterjee, M.; Matsushima, K.; Ikushima, Y.; Sato, M.; Yokoyama, T.; Kawanami, H.; Suzuki, T. Production of linear alkane via hydrogenative ring opening of a furfural-derived compound in supercritical carbon dioxide. *Green Chem.* **2010**, *12*, 779.
4. Xia, Q.N.; Cuan, Q.; Liu, X.H.; Gong, X.Q.; Lu, G.Z.; Wang, Y.Q. Pd/NbOPO<sub>4</sub> Multifunctional Catalyst for the Direct Production of Liquid Alkanes from Aldol Adducts of Furans. *Angew. Chem. (International ed. in English)* **2014**, *53*, 9755–9760.
5. Shao, Y.; Xia, Q.; Liu, X.; Lu, G.; Wang, Y. Pd/Nb<sub>2</sub>O<sub>5</sub>/SiO<sub>2</sub> Catalyst for the Direct Hydrodeoxygenation of Biomass-Related Compounds to Liquid Alkanes under Mild Conditions. *ChemSusChem* **2015**, *8*, 1761–1767.
